# Supplementary material for: Analysis of Comorbidities, Clinical Outcomes, and Parathyroidectomy in Adults With Primary Hyperparathyroidism
Source: PubMed Central journal article supplement (PMC9166253; doi:10.1001/jamanetworkopen.2022.15396), 2022-06-03
Supplement: jamanetwopen-e2215396-s001.pdf [file jamanetwopen-e2215396-s001.pdf]

## Supplemental Online Content

Axelsson KF, Wallander M, Johansson H, et al. Analysis of comorbidities, clinical outcomes, and parathyroidectomy in adults with primary hyperparathyroidism. *JAMA Netw Open.* 2022;5(6):e2215396. doi:10.1001/jamanetworkopen.2022.15396

**eTable 1.** Definitions

**eTable 2.** Other Fracture Outcomes

**eTable 3.** Cardiovascular Outcomes

**eTable 4.** Overall Death and Cardiovascular Deaths

**eTable 5.** Clinical Outcomes per Sex

**eTable 6.** Clinical Outcomes Within One Year

**eFigure.** Cumulative Incidence Function in PHPT Patients vs. Controls

**eTable 7.** Subhazard Ratios for PHPT Patients vs. Population Controls, With Consideration of Competing Risk of Death

**eTable 8.** Outcomes for PTX Patients After Surgery Using the Same PTX Patients Before Surgery as Controls

This supplemental material has been provided by the authors to give readers additional information about their work.

## **Introduction**

For classification of diseases, sign and symptoms, surgical procedures, we used digital records of ICD-10 i.e. the 10<sup>th</sup> revision of the International Statistical Classification of Diseases and Related Health Problems (ICD), a medical classification list by the World Health Organization (WHO).

For classification of medications, we used The Anatomical Therapeutic Chemical (ATC) Classification System. It is overseen by the World Health Organization Collaborating Centre for Drug Statistics Methodology (WHOCC).

**eTable 1. Definitions**

| <b>Variable</b>                                       | <b>Definitions using ICD-10 or ATC codes</b>                                                                                                                                                                                                                                                                                                                                                             |
|-------------------------------------------------------|----------------------------------------------------------------------------------------------------------------------------------------------------------------------------------------------------------------------------------------------------------------------------------------------------------------------------------------------------------------------------------------------------------|
| Fracture                                              | S02, S12, S22, S32, S42, S52, S62, S72, S82, S92, T02, T08, T10, T12, T142, M485                                                                                                                                                                                                                                                                                                                         |
| Non-skeletal fall injury                              | W00-W19 code and a S00-T14 diagnosis, but not a simultaneous fracture                                                                                                                                                                                                                                                                                                                                    |
| Cardiovascular event                                  | I21-I22, I61, I63                                                                                                                                                                                                                                                                                                                                                                                        |
| Myocardial infarction                                 | I21-I22                                                                                                                                                                                                                                                                                                                                                                                                  |
| Ischemic stroke                                       | I61                                                                                                                                                                                                                                                                                                                                                                                                      |
| Hemorrhagic stroke                                    | I63                                                                                                                                                                                                                                                                                                                                                                                                      |
| Kidney stone                                          | N20-N22                                                                                                                                                                                                                                                                                                                                                                                                  |
| <b><u>Charlson Comorbidity Component (weight)</u></b> |                                                                                                                                                                                                                                                                                                                                                                                                          |
| Dementia (1)                                          | F00-F03                                                                                                                                                                                                                                                                                                                                                                                                  |
| Ischemic heart disease (1)                            | I20-I25                                                                                                                                                                                                                                                                                                                                                                                                  |
| Heart failure (1)                                     | I50                                                                                                                                                                                                                                                                                                                                                                                                      |
| Cerebrovascular disease (1)                           | I60-I69                                                                                                                                                                                                                                                                                                                                                                                                  |
| Vascular diseases (1)                                 | I70-I79                                                                                                                                                                                                                                                                                                                                                                                                  |
| Chronic pulmonary diseases (1)                        | J43-J46                                                                                                                                                                                                                                                                                                                                                                                                  |
| Chronic liver disease (1)                             | K70-K77                                                                                                                                                                                                                                                                                                                                                                                                  |
| Tumor without metastasis (2)                          | C00-C76, C80, C97                                                                                                                                                                                                                                                                                                                                                                                        |
| Lymphoma or leukemia (2)                              | C81-C96                                                                                                                                                                                                                                                                                                                                                                                                  |
| Diabetes (1)                                          | E10-E14                                                                                                                                                                                                                                                                                                                                                                                                  |
| with end organ damage (+1)                            | E102, E103, E104, E105, E107, E112, E113, E114, E115, E117, H360                                                                                                                                                                                                                                                                                                                                         |
| Kidney disease, renal failure (1)                     | N17-N19                                                                                                                                                                                                                                                                                                                                                                                                  |
| moderate or severe (+1)                               | N18.2-N18.5                                                                                                                                                                                                                                                                                                                                                                                              |
| Hemiplegia (2)                                        | G81                                                                                                                                                                                                                                                                                                                                                                                                      |
| Peptic ulcer disease (2)                              | K25-K27                                                                                                                                                                                                                                                                                                                                                                                                  |
| Metastatic solid tumor (6)                            | C77-C79                                                                                                                                                                                                                                                                                                                                                                                                  |
| Osteoporosis                                          | M80-M81                                                                                                                                                                                                                                                                                                                                                                                                  |
| Alcohol related diseases                              | Mental and behavioural disorders due to use of alcohol (F10), Degeneration of nervous system due to alcohol (G31.2), Alcoholic polyneuropathy (G62.1), Alcoholic myopathy (G72.1), Alcoholic cardiomyopathy (I42.6), Alcoholic gastritis (K29.2), Alcoholic liver disease (K70), Alcohol-induced acute pancreatitis (K85.2), Alcohol-induced chronic pancreatitis (K86.0), Toxic effect of alcohol (T51) |
| Rheumatoid arthritis                                  | M05-M06                                                                                                                                                                                                                                                                                                                                                                                                  |
| Hyperthyroidism                                       | E05                                                                                                                                                                                                                                                                                                                                                                                                      |

|                                  |                                                                                                                                                                                                                                                                                                                                                                                                                                                                                                 |
|----------------------------------|-------------------------------------------------------------------------------------------------------------------------------------------------------------------------------------------------------------------------------------------------------------------------------------------------------------------------------------------------------------------------------------------------------------------------------------------------------------------------------------------------|
| Prednisolone use                 | Any previous three-month period in which more than 450 mg prednisolon (ATC-code H02AB06) were collected, i.e. more than 5 mg/day within a three-month period                                                                                                                                                                                                                                                                                                                                    |
| Osteoporosis medication          | <p><u>Prescriptions:</u> Bisphosphonates (M05BA and M05BB), Denosumab (M05BX04), Teriparatid (H05AA02), Strontium (M05BX03), Raloxifene (G03XC01), Testosterone (G03BA03), Systemic estrogens (G03CA) Tibolon (G03CX01).</p> <p><u>Non-prescribed parenteral treatment offered to patients at outpatient clinics or while admitted:</u> The combination of an osteoporosis diagnosis (M80, M81 or M859) and a code for intravenous (DT016) or subcutaneous (DT021) administration was used.</p> |
| <b><u>Other medications:</u></b> | Repeated ( $\geq 2$ collected prescriptions last year) and Recent (last prescription within 120 days)                                                                                                                                                                                                                                                                                                                                                                                           |
| Calcium and vitamin D            | A12AX                                                                                                                                                                                                                                                                                                                                                                                                                                                                                           |
| Opioids                          | N02A                                                                                                                                                                                                                                                                                                                                                                                                                                                                                            |
| Antiepileptics                   | N03A                                                                                                                                                                                                                                                                                                                                                                                                                                                                                            |
| Anti-Parkinson drugs             | N04                                                                                                                                                                                                                                                                                                                                                                                                                                                                                             |
| Antidepressants                  | N06A                                                                                                                                                                                                                                                                                                                                                                                                                                                                                            |
| Anti-dementia drugs              | N06D                                                                                                                                                                                                                                                                                                                                                                                                                                                                                            |
| Thiazid diuretics                | C03A                                                                                                                                                                                                                                                                                                                                                                                                                                                                                            |
| Beta-blockers                    | C07                                                                                                                                                                                                                                                                                                                                                                                                                                                                                             |
| Calcium antagonist               | C08                                                                                                                                                                                                                                                                                                                                                                                                                                                                                             |
| RAS-inhibitors                   | C09                                                                                                                                                                                                                                                                                                                                                                                                                                                                                             |

---

**eTable 2.** Other Fracture Outcomes

|                                  |                                   | <b>Controls</b><br>N=163,740 | <b>PHPT</b><br>N=16,374 | <b>p-value</b> |
|----------------------------------|-----------------------------------|------------------------------|-------------------------|----------------|
|                                  | Time at risk, years, median (IQR) | 4.62 (2.08-7.51)             | 1.15 (0.40-4.06)        |                |
| <b><u>Lower leg fracture</u></b> | Events, n (%)                     | 2,544 (1.6%)                 | 158 (1.0%)              |                |
|                                  | per 1000 person-years (95% CI)    | 3.52 (3.38-3.66)             | 4.58 (3.89-5.35)        |                |
|                                  | Cox, unadjusted, HR (95%CI)       | Ref [1]                      | 1.31 (1.12-1.54)        | <0.001         |
|                                  | Cox, adjusted, HR (95%CI)         | Ref [1]                      | 1.19 (1.01-1.40)        | 0.03           |
| <b><u>Upper arm fracture</u></b> | Events, n (%)                     | 2,406 (1.5%)                 | 167 (1.0%)              |                |
|                                  | per 1000 person-years (95% CI)    | 3.32 (3.19-3.46)             | 4.84 (4.14-5.64)        |                |
|                                  | Cox, unadjusted, HR (95%CI)       | Ref [1]                      | 1.46 (1.25-1.71)        | <0.001         |
|                                  | Cox, adjusted, HR (95%CI)         | Ref [1]                      | 1.29 (1.10-1.51)        | 0.002          |
| <b><u>Wrist fracture</u></b>     | Events, n (%)                     | 3,885 (2.4%)                 | 248 (1.5%)              |                |
|                                  | per 1000 person-years (95% CI)    | 5.40 (5.23-5.57)             | 7.24 (6.37-8.20)        |                |
|                                  | Cox, unadjusted, HR (95%CI)       | Ref [1]                      | 1.34 (1.18-1.52)        | <0.001         |
|                                  | Cox, adjusted, HR (95%CI)         | Ref [1]                      | 1.25 (1.10-1.42)        | <0.001         |

Lower Leg Fracture (S82), Upper Arm Fracture (S422) and Wrist Fracture (S525-S526).  
Adjusted Cox models adjusted for age, sex, Charlson comorbidity index and previous fracture.

**eTable 3.** Cardiovascular Outcomes

|                                           | Follow-up truncated after 1 year |                    | Maximum follow-up     |                    |
|-------------------------------------------|----------------------------------|--------------------|-----------------------|--------------------|
|                                           | Controls<br>N=163,740            | PHPT<br>N=16,374   | Controls<br>N=163,740 | PHPT<br>N=16,374   |
| Time at risk, years, median (IQR)         | 1.00 (1.00-1.00)                 | 1.00 (0.40-1.00)   | 4.62 (2.08-7.51)      | 1.15 (0.40-4.06)   |
| <b><u>Any cardiovascular event</u></b>    |                                  |                    |                       |                    |
| Events, n (%)                             | 1,735 (1.1%)                     | 208 (1.3%)         | 9,350 (5.7%)          | 703 (4.3%)         |
| per 1000 person-years (95% CI)            | 11.4 (10.8-11.9)                 | 17.6 (15.3-20.2)   | 12.0 (11.7-12.2)      | 17.2 (16.0-18.5)   |
| Cox, unadjusted, HR (95%CI)               | Ref [1]                          | 1.56 (1.35-1.80)*  | Ref [1]               | 1.45 (1.34-1.57)*  |
| Cox, adjusted, HR (95%CI)                 | Ref [1]                          | 1.41 (1.22-1.63)*  | Ref [1]               | 1.22 (1.13-1.32)*  |
| <b><u>Acute myocardial infarction</u></b> |                                  |                    |                       |                    |
| Events, n (%)                             | 797 (0.5%)                       | 91 (0.6%)          | 4,346 (2.7%)          | 315 (1.9%)         |
| per 1000 person-years (95% CI)            | 5.21 (4.85-5.58)                 | 7.68 (6.18-9.42)   | 5.48 (5.32-5.65)      | 7.56 (6.75-8.45)   |
| Cox, unadjusted, HR (95%CI)               | Ref [1]                          | 1.48 (1.19-1.84)*  | Ref [1]               | 1.39 (1.24-1.56)*  |
| Cox, adjusted, HR (95%CI)                 | Ref [1]                          | 1.34 (1.08-1.67)** | Ref [1]               | 1.18 (1.05-1.32)** |
| <b><u>Hemorrhagic stroke</u></b>          |                                  |                    |                       |                    |
| Events, n (%)                             | 146 (0.1%)                       | 15 (0.1%)          | 884 (0.5%)            | 50 (0.3%)          |
| per 1000 person-years (95% CI)            | 0.95 (0.80-1.12)                 | 1.26 (0.71-2.08)   | 1.10 (1.03-1.18)      | 1.18 (0.88-1.56)   |
| Cox, unadjusted, HR (95%CI)               | Ref [1]                          | 1.32 (0.78-2.25)   | Ref [1]               | 1.09 (0.82-1.45)   |
| Cox, adjusted, HR (95%CI)                 | Ref [1]                          | 1.19 (0.70-2.03)   | Ref [1]               | 0.94 (0.71-1.26)   |
| <b><u>Ischemic stroke</u></b>             |                                  |                    |                       |                    |
| Events, n (%)                             | 836 (0.5%)                       | 109 (0.7%)         | 4,723 (2.9%)          | 370 (2.3%)         |
| per 1000 person-years (95% CI)            | 5.46 (5.10-5.84)                 | 9.21 (7.56-11.1)   | 5.96 (5.80-6.14)      | 8.91 (8.02-9.86)   |
| Cox, unadjusted, HR (95%CI)               | Ref [1]                          | 1.70 (1.39-2.07)*  | Ref [1]               | 1.51 (1.36-1.68)*  |
| Cox, adjusted, HR (95%CI)                 | Ref [1]                          | 1.54 (1.26-1.88)*  | Ref [1]               | 1.25 (1.13-1.39)*  |

Any Cardiovascular Event (CVE) included admissions with myocardial infarction (I21-I22), hemorrhagic stroke (I63) or ischemic stroke (I61) with a seven-year washout period used for each diagnosis.

Adjusted Cox models were adjusted for age, sex, Charlson comorbidity index and previous CVE.

\* p<0.001

\*\* p<0.01

**eTable 4.** Overall Death and Cardiovascular Deaths

|                                                                   | Follow-up truncated after 1 year |                  | Maximum follow-up     |                               |
|-------------------------------------------------------------------|----------------------------------|------------------|-----------------------|-------------------------------|
|                                                                   | Controls<br>N=163,740            | PHPT<br>N=16,374 | Controls<br>N=163,740 | PHPT<br>N=16,374              |
| Time at risk, years, median (IQR)                                 | 1.00 (1.00-1.00)                 | 1.00 (0.40-1.00) | 4.62 (2.08-7.51)      | 1.15 (0.40-4.06)              |
| <b><u>Deaths overall</u></b>                                      |                                  |                  |                       |                               |
| Events, n (%)                                                     | 4,040 (2.5%)                     | 580 (3.5%)       | 24,869 (15.2%)        | 2,193 (13.4%)                 |
| per 1000 person-years (95% CI)                                    | 26.3 (25.5-27.2)                 | 48.8 (44.9-52.9) | 31.0 (30.6-31.3)      | 51.8 (49.7-54.1)              |
| Cox, unadjusted, HR (95%CI)                                       | Ref [1]                          | 1.85 (1.70-2.02) | Ref [1]               | 1.72 (1.65-1.80)              |
| Cox, adjusted <sup>a</sup> , HR (95%CI)                           | Ref [1]                          | 1.49 (1.37-1.63) | Ref [1]               | 1.27 (1.22-1.33)              |
| <b><u>Deaths related to cardiovascular disease</u></b>            |                                  |                  |                       |                               |
| Events, n (%)                                                     | 1,356 (0.8%)                     | 210 (1.3%)       | 8,106 (5.0%)          | 722 (4.4%)                    |
| per 1000 person-years (95% CI)                                    | 8.84 (8.37-9.32)                 | 17.7 (15.4-20.2) | 10.1 (9.87-10.3)      | 17.1 (15.8-18.4)              |
| Cox, unadjusted, HR (95%CI)                                       | Ref [1]                          | 2.00 (1.73-2.32) | Ref [1]               | 1.73 (1.60-1.86)              |
| Cox, adjusted <sup>b</sup> , HR (95%CI)                           | Ref [1]                          | 1.62 (1.40-1.87) | Ref [1]               | 1.24 (1.15-1.34)              |
| <b><u>Deaths related to ischemic heart disease (I20-I25)</u></b>  |                                  |                  |                       |                               |
| Events, n (%)                                                     | 829 (0.5%)                       | 130 (0.8%)       | 4,903 (3.0%)          | 454 (2.8%)                    |
| per 1000 person-years (95% CI)                                    | 5.40 (5.04-5.78)                 | 10.9 (9.14-13.0) | 6.10 (5.93-6.28)      | 10.7 (9.77-11.8)              |
| Cox, unadjusted, HR (95%CI)                                       | Ref [1]                          | 2.02 (1.68-2.43) | Ref [1]               | 1.79 (1.63-1.97)              |
| Cox, adjusted <sup>b</sup> , HR (95%CI)                           | Ref [1]                          | 1.62 (1.35-1.95) | Ref [1]               | 1.27 (1.15-1.40)              |
| <b><u>Deaths related to cerebrovascular disease (I60-I69)</u></b> |                                  |                  |                       |                               |
| Events, n (%)                                                     | 639 (0.4%)                       | 94 (0.6%)        | 3,927 (2.4%)          | 339 (2.1%)                    |
| per 1000 person-years (95% CI)                                    | 4.16 (3.85-4.50)                 | 7.91 (6.39-9.68) | 4.89 (4.74-5.04)      | 8.01 (7.18-8.91)              |
| Cox, unadjusted, HR (95%CI)                                       | Ref [1]                          | 1.92 (1.55-2.38) | Ref [1]               | 1.68 (1.51-1.88)              |
| Cox, adjusted <sup>b</sup> , HR (95%CI)                           | Ref [1]                          | 1.54 (1.24-1.91) | Ref [1]               | 1.20 (1.07-1.34) <sup>c</sup> |

<sup>a</sup> Adjustment for age, sex, Charlson comorbidity index. <sup>b</sup> Adjustment for age, sex, Charlson comorbidity index and previous cardiovascular event. <sup>c</sup> p=0.002, for all other HR p<0.001. Deaths related to cardiovascular disease included deaths related to ischemic heart disease and cerebrovascular disease.

**eTable 5. Clinical Outcomes per Sex**

|                                             | Men                  |                               | Women                 |                               |
|---------------------------------------------|----------------------|-------------------------------|-----------------------|-------------------------------|
|                                             | Controls<br>N=35,680 | PHPT<br>N=3,568               | Controls<br>N=128,060 | PHPT<br>N=12,806              |
| Time at risk, years, median (IQR)           | 4.42 (1.97-7.44)     | 1.01 (0.36-3.66)              | 4.67 (2.12-7.52)      | 1.21 (0.42-4.18)              |
| <b><u>Any fracture</u></b>                  |                      |                               |                       |                               |
| Events, n (%)                               | 2,586 (7.2%)         | 181 (5.1%)                    | 14,740 (11.5%)        | 969 (7.6%)                    |
| per 1000 person-years (95% CI)              | 16.1 (15.5-16.7)     | 24.2 (20.8-28.0)              | 28.2 (27.8-28.7)      | 38.9 (36.5-41.5)              |
| Cox, unadjusted, HR (95%CI)                 | Ref [1]              | 1.49 (1.28-1.73)              | Ref [1]               | 1.37 (1.28-1.46)              |
| Cox, adjusted, HR (95%CI)                   | Ref [1]              | 1.31 (1.12-1.52)              | Ref [1]               | 1.21 (1.13-1.29)              |
| <b><u>Hip fracture</u></b>                  |                      |                               |                       |                               |
| Events, n (%)                               | 679 (1.9%)           | 59 (1.7%)                     | 3,840 (3.0%)          | 260 (2.0%)                    |
| per 1000 person-years (95% CI)              | 4.08 (3.78-4.40)     | 7.61 (5.79-9.82)              | 6.92 (6.70-7.14)      | 9.80 (8.64-11.1)              |
| Cox, unadjusted, HR (95%CI)                 | Ref [1]              | 1.91 (1.46-2.49)              | Ref [1]               | 1.44 (1.27-1.64)              |
| Cox, adjusted, HR (95%CI)                   | Ref [1]              | 1.65 (1.26-2.15)              | Ref [1]               | 1.13 (1.00-1.28) <sup>a</sup> |
| <b><u>Injurious fall</u></b>                |                      |                               |                       |                               |
| Events, n (%)                               | 2,858 (8.0%)         | 214 (6.0%)                    | 11,578 (9.0%)         | 916 (7.2%)                    |
| per 1000 person-years (95% CI)              | 17.5 (16.9-18.2)     | 26.5 (23.1-30.3)              | 19.4 (19.0-19.7)      | 29.1 (27.3-31.1)              |
| Cox, unadjusted, HR (95%CI)                 | Ref [1]              | 1.50 (1.31-1.73)              | Ref [1]               | 1.51 (1.41-1.61)              |
| Cox, adjusted, HR (95%CI)                   | Ref [1]              | 1.32 (1.14-1.51)              | Ref [1]               | 1.30 (1.21-1.39)              |
| <b><u>Any cardiovascular event</u></b>      |                      |                               |                       |                               |
| Events, n (%)                               | 2,569 (7.2%)         | 166 (4.7%)                    | 6,781 (5.3%)          | 537 (4.2%)                    |
| per 1000 person-years (95% CI)              | 15.6 (15.0-16.2)     | 20.2 (17.2-23.5)              | 11.0 (10.8-11.3)      | 16.5 (15.1-17.9)              |
| Cox, unadjusted, HR (95%CI)                 | Ref [1]              | 1.31 (1.12-1.53)              | Ref [1]               | 1.51 (1.38-1.65)              |
| Cox, adjusted, HR (95%CI)                   | Ref [1]              | 1.15 (0.99-1.35) <sup>b</sup> | Ref [1]               | 1.24 (1.13-1.35)              |
| <b><u>Kidney stone</u></b>                  |                      |                               |                       |                               |
| Events, n (%)                               | 866 (2.4%)           | 156 (4.4%)                    | 1,101 (0.9%)          | 228 (1.8%)                    |
| per 1000 person-years (95% CI)              | 5.14 (4.80-5.49)     | 19.1 (16.2-22.3)              | 1.75 (1.65-1.86)      | 6.86 (6.00-7.81)              |
| Cox, unadjusted, HR (95%CI)                 | Ref [1]              | 3.59 (3.03-4.26)              | Ref [1]               | 3.83 (3.32-4.42)              |
| Cox, adjusted, HR (95%CI)                   | Ref [1]              | 2.54 (2.13-3.04)              | Ref [1]               | 2.64 (2.27-3.07)              |
| <b><u>Death</u></b>                         |                      |                               |                       |                               |
| Events, n (%)                               | 5,884 (16.5%)        | 511 (14.3%)                   | 18,985 (14.8%)        | 1,682 (13.1%)                 |
| per 1000 person-years (95% CI)              | 34.4 (33.5-35.2)     | 59.7 (54.6-65.1)              | 30.0 (29.6-30.5)      | 49.8 (47.5-52.3)              |
| Cox, unadjusted, HR (95%CI)                 | Ref [1]              | 1.77 (1.62-1.94)              | Ref [1]               | 1.71 (1.63-1.80)              |
| Cox, adjusted, HR (95%CI)                   | Ref [1]              | 1.35 (1.23-1.48)              | Ref [1]               | 1.25 (1.19-1.31)              |
| <b><u>Cardiovascular related deaths</u></b> |                      |                               |                       |                               |
| Events, n (%)                               | 2,153 (6.0%)         | 187 (5.2%)                    | 5,953 (4.6%)          | 535 (4.2%)                    |
| per 1000 person-years (95% CI)              | 12.6 (12.0-13.1)     | 21.8 (18.8-25.2)              | 9.42 (9.18-9.66)      | 15.9 (14.5-17.3)              |
| Cox, unadjusted, HR (95%CI)                 | Ref [1]              | 1.76 (1.52-2.05)              | Ref [1]               | 1.72 (1.58-1.88)              |
| Cox, adjusted, HR (95%CI)                   | Ref [1]              | 1.31 (1.12-1.52)              | Ref [1]               | 1.21 (1.11-1.33)              |

Adjusted Cox models adjusted for age, sex, Charlson comorbidity index and the outcome in question (previous fracture, injurious fall, CVE or kidney stone respectively). All HR p-values <0.001 except for a (p=0.05) and b (p = 0.08).



**eTable 6.** Clinical Outcomes Within One Year

|                                             | Follow-up truncated after 1 year |                                | Maximum follow-up     |                               |
|---------------------------------------------|----------------------------------|--------------------------------|-----------------------|-------------------------------|
|                                             | Controls<br>N=163,740            | PHPT<br>N=16,374               | Controls<br>N=163,740 | PHPT<br>N=16,374              |
| Time at risk, years, median (IQR)           | 1.00 (1.00-1.00)                 | 1.00 (0.40-1.00)               | 4.62 (2.08-7.51)      | 1.15 (0.40-4.06)              |
| <b><u>Any fracture</u></b>                  |                                  |                                |                       |                               |
| Events, n (%)                               | 3,724 (2.3%)                     | 417 (2.5%)                     | 17,326 (10.6%)        | 1,150 (7.0%)                  |
| per 1000 person-years (95% CI)              | 25.8 (25.0-26.7)                 | 39.8 (36.0-43.8)               | 25.4 (25.0-25.7)      | 35.5 (33.5-37.6)              |
| Cox, unadjusted, HR (95%CI)                 | Ref [1]                          | 1.53 (1.38-1.69)               | Ref [1]               | 1.39 (1.31-1.48)              |
| Cox, adjusted, HR (95%CI)                   | Ref [1]                          | 1.38 (1.25-1.53)               | Ref [1]               | 1.22 (1.15-1.30)              |
| <b><u>Hip fracture</u></b>                  |                                  |                                |                       |                               |
| Events, n (%)                               | 816 (0.5%)                       | 90 (0.5%)                      | 4,519 (2.8%)          | 319 (1.9%)                    |
| per 1000 person-years (95% CI)              | 5.61 (5.23-6.01)                 | 8.47 (6.81-10.4)               | 6.26 (6.08-6.45)      | 9.30 (8.31-10.4)              |
| Cox, unadjusted, HR (95%CI)                 | Ref [1]                          | 1.51 (1.21-1.87)               | Ref [1]               | 1.51 (1.35-1.70)              |
| Cox, adjusted, HR (95%CI)                   | Ref [1]                          | 1.34 (1.07-1.66 <sup>a</sup> ) | Ref [1]               | 1.20 (1.07-1.35) <sup>b</sup> |
| <b><u>Injurious fall</u></b>                |                                  |                                |                       |                               |
| Events, n (%)                               | 2,904 (1.8%)                     | 360 (2.2%)                     | 14,436 (8.8%)         | 1,130 (6.9%)                  |
| per 1000 person-years (95% CI)              | 19.1 (18.4-19.8)                 | 30.7 (27.6-34.1)               | 19.0 (18.7-19.3)      | 28.6 (27.0-30.3)              |
| Cox, unadjusted, HR (95%CI)                 | Ref [1]                          | 1.61 (1.44-1.79)               | Ref [1]               | 1.51 (1.42-1.60)              |
| Cox, adjusted, HR (95%CI)                   | Ref [1]                          | 1.43 (1.28-1.60)               | Ref [1]               | 1.30 (1.22-1.38)              |
| <b><u>Any cardiovascular event</u></b>      |                                  |                                |                       |                               |
| Events, n (%)                               | 1,735 (1.1%)                     | 208 (1.3%)                     | 9,350 (5.7%)          | 703 (4.3%)                    |
| per 1000 person-years (95% CI)              | 11.4 (10.8-11.9)                 | 17.6 (15.3-20.2)               | 12.0 (11.7-12.2)      | 17.2 (16.0-18.5)              |
| Cox, unadjusted, HR (95%CI)                 | Ref [1]                          | 1.56 (1.35-1.80)               | Ref [1]               | 1.45 (1.34-1.57)              |
| Cox, adjusted, HR (95%CI)                   | Ref [1]                          | 1.41 (1.22-1.63)               | Ref [1]               | 1.22 (1.13-1.32)              |
| <b><u>Kidney stone</u></b>                  |                                  |                                |                       |                               |
| Events, n (%)                               | 409 (0.2%)                       | 150 (0.9%)                     | 1,967 (1.2%)          | 384 (2.3%)                    |
| per 1000 person-years (95% CI)              | 2.67 (2.42-2.94)                 | 12.7 (10.7-14.9)               | 2.47 (2.36-2.58)      | 9.27 (8.37-10.3)              |
| Cox, unadjusted, HR (95%CI)                 | Ref [1]                          | 4.72 (3.92-5.70)               | Ref [1]               | 3.65 (3.27-4.08)              |
| Cox, adjusted, HR (95%CI)                   | Ref [1]                          | 3.16 (2.59-3.85)               | Ref [1]               | 2.60 (2.32-2.91)              |
| <b><u>Death</u></b>                         |                                  |                                |                       |                               |
| Events, n (%)                               | 4,040 (2.5%)                     | 580 (3.5%)                     | 24,869 (15.2%)        | 2,193 (13.4%)                 |
| per 1000 person-years (95% CI)              | 26.3 (25.5-27.2)                 | 48.8 (44.9-52.9)               | 31.0 (30.6-31.3)      | 51.8 (49.7-54.1)              |
| Cox, unadjusted, HR (95%CI)                 | Ref [1]                          | 1.85 (1.70-2.02)               | Ref [1]               | 1.72 (1.65-1.80)              |
| Cox, adjusted, HR (95%CI)                   | Ref [1]                          | 1.49 (1.37-1.63)               | Ref [1]               | 1.27 (1.22-1.33)              |
| <b><u>Cardiovascular related deaths</u></b> |                                  |                                |                       |                               |
| Events, n (%)                               | 1,356 (0.8%)                     | 210 (1.3%)                     | 8,106 (5.0%)          | 722 (4.4%)                    |
| per 1000 person-years (95% CI)              | 8.84 (8.37-9.32)                 | 17.7 (15.4-20.2)               | 10.1 (9.87-10.3)      | 17.1 (15.8-18.4)              |
| Cox, unadjusted, HR (95%CI)                 | Ref [1]                          | 2.00 (1.73-2.32)               | Ref [1]               | 1.73 (1.60-1.86)              |
| Cox, adjusted, HR (95%CI)                   | Ref [1]                          | 1.62 (1.40-1.87)               | Ref [1]               | 1.24 (1.15-1.34)              |

Maximum follow-up (=Table 2) included for comparison, presented in shaded gray. Adjusted Cox models adjusted for age, sex, Charlson comorbidity index and the outcome in question (previous fracture, injurious fall, CVE or kidney stone respectively). All HR p-values <0.001 except for a (p=0.009) and b (p = 0.002).

**Figure.** Cumulative Incidence Function in PHPT Patients vs. Controls

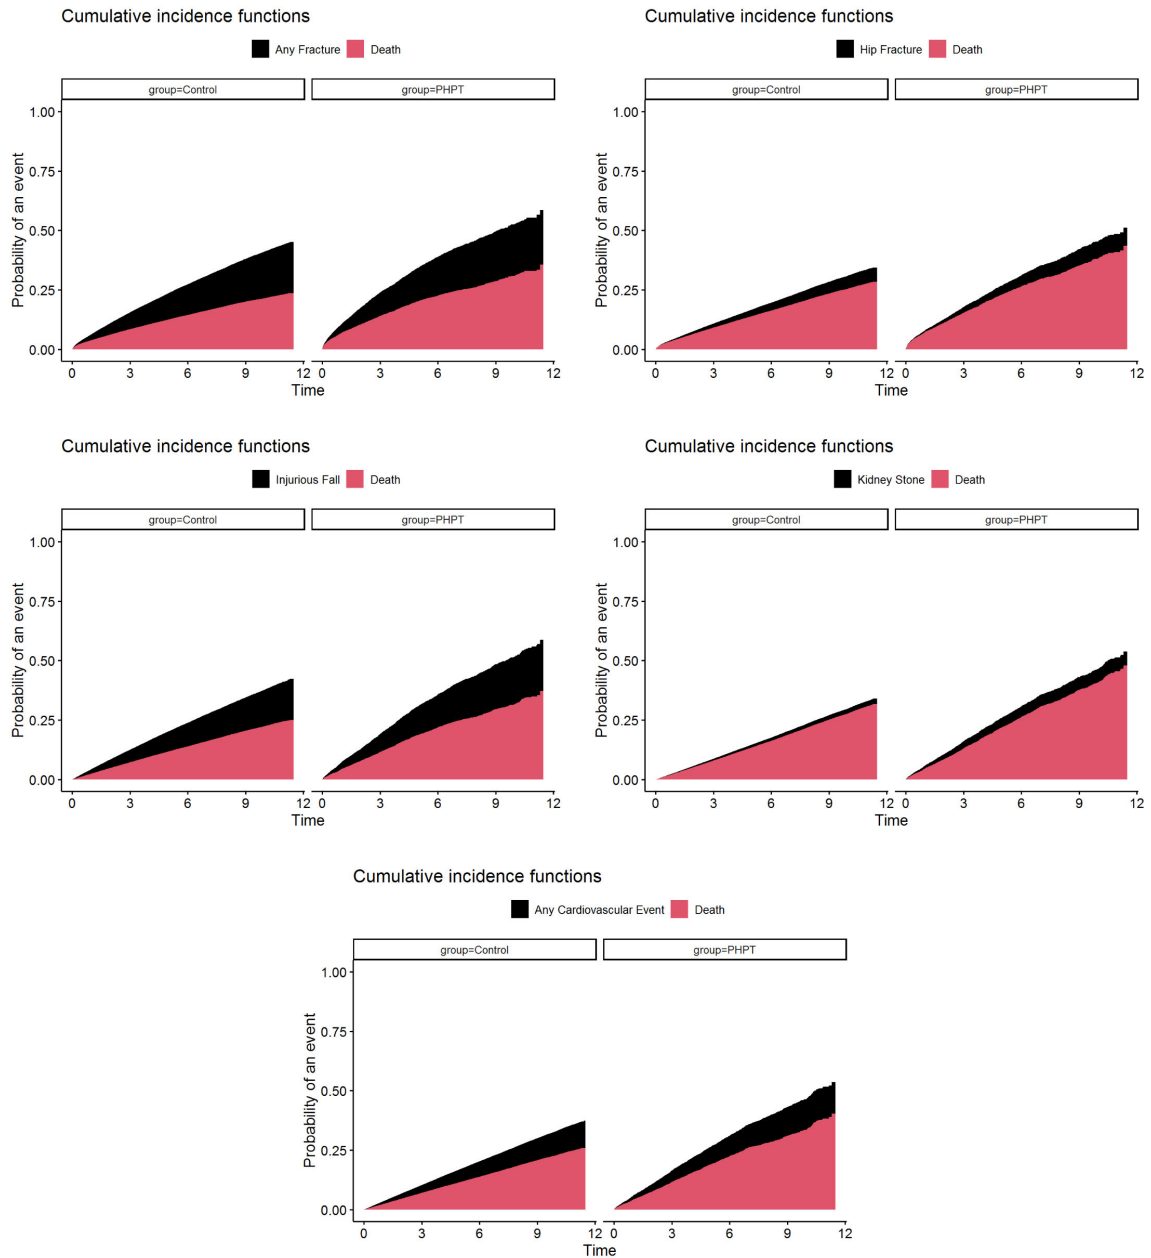

The cumulative incidence function, or subdistribution function, of fracture/injurious fall with death as competing risk was estimated using the Aalen-Johansen estimator. All patients and controls were included in the analysis.

**eTable 7.** Subhazard Ratios for PHPT Patients vs. Population Controls, With Consideration of Competing Risk of Death

| Event                       | Follow-up              |         |                  |         |
|-----------------------------|------------------------|---------|------------------|---------|
|                             | Truncated After 1 year |         | Maximum          |         |
|                             | SHR (95%CI)            | p-value | SHR (95%CI)      | p-value |
| Any fracture                | 1.57 (1.36-1.81)       | <0.001  | 1.22 (1.13-1.31) | <0.001  |
| Major osteoporotic fracture | 1.73 (1.45-2.07)       | <0.001  | 1.27 (1.16-1.39) | <0.001  |
| Hip fracture                | 1.67 (1.23-2.26)       | 0.001   | 1.37 (1.19-1.58) | <0.001  |
| Injurious fall              | 1.53 (1.32-1.79)       | <0.001  | 1.31 (1.22-1.42) | <0.001  |
| Any cardiovascular Event    | 1.35 (1.11-1.64)       | 0.003   | 1.29 (1.17-1.42) | <0.001  |
| Kidney stone                | 3.97 (2.87-5.50)       | <0.001  | 3.22 (2.72-3.82) | <0.001  |

Subhazard ratios (SHR) with 95% CI for fractures, injurious falls, any cardiovascular events and kidney stones using the Fine & Grey model with death as the competing risk. The analyses was performed in a subset of 32,748 individuals, comparing all 16,374 PHPT patients and 16,374 controls matched according to age, sex and county of residence (=first control assigned per case in main analysis). Results are presented for the maximum available and for one-year follow-up.

**eTable 8.** Outcomes for PTX Patients After Surgery Using the Same PTX Patients Before Surgery as Controls

|                                                | PTX Patients       |                     | p-value |
|------------------------------------------------|--------------------|---------------------|---------|
|                                                | Pre PTX<br>N=6,934 | Post PTX<br>N=6,934 |         |
| Time at Risk, years, median (IQR)              | 0.48 (0.24-0.92)   | 4.78 (2.21-7.18)    |         |
| <b><u>Any fracture</u></b>                     |                    |                     |         |
| Events, n (%)                                  | 139 (2.0%)         | 589 (8.5%)          |         |
| Per 1000 person-years (95% CI)                 | 27.8 (23.4-32.9)   | 21.5 (19.8-23.3)    |         |
| Cox, adj for age and sex, HR (95% CI)          | Ref [1]            | 0.77 (0.63-0.95)    | 0.01    |
| Cox, outcome-specific adjustment*, HR (95% CI) | Ref [1]            | 0.76 (0.62-0.93)    | 0.008   |
| <b><u>Major osteoporotic fracture</u></b>      |                    |                     |         |
| Events, n (%)                                  | 79 (1.1%)          | 362 (5.2%)          |         |
| Per 1000 person-years (95% CI)                 | 15.6 (12.4-19.4)   | 12.9 (11.6-14.3)    |         |
| Cox, adj for age and sex, HR (95% CI)          | Ref [1]            | 0.75 (0.57-0.99)    | 0.04    |
| Cox, outcome-specific adjustment*, HR (95% CI) | Ref [1]            | 0.74 (0.56-0.97)    | 0.03    |
| <b><u>Injurious fall</u></b>                   |                    |                     |         |
| Events, n (%)                                  | 90 (1.3%)          | 577 (8.3%)          |         |
| Per 1000 person-years (95% CI)                 | 16.1 (13.0-19.8)   | 18.1 (16.7-19.6)    |         |
| Cox, adj for age and sex, HR (95% CI)          | Ref [1]            | 1.02 (0.80-1.31)    | 0.85    |
| Cox, outcome-specific adjustment*, HR (95% CI) | Ref [1]            | 1.01 (0.79-1.30)    | 0.91    |
| <b><u>Kidney stone</u></b>                     |                    |                     |         |
| Events, n (%)                                  | 112 (1.6%)         | 277 (4.0%)          |         |
| Per 1000 person-years (95% CI)                 | 20.0 (16.5-24.1)   | 8.48 (7.51-9.54)    |         |
| Cox, adj for age and sex, HR (95% CI)          | Ref [1]            | 0.61 (0.48-0.78)    | <0.001  |
| Cox, outcome-specific adjustment*, HR (95% CI) | Ref [1]            | 0.54 (0.42-0.69)    | <0.001  |

PTX patients were followed from PHPT diagnosis to the date of PTX (PrePTX) and from date of PTX to end of study, emigration or death (PostPTX). Cox proportional hazards models were used to study the risk of outcomes before (reference) and after PTX. \*Adjustment for age, sex, Charlson Comorbidity Index and the investigated outcome (previous fracture, injurious fall, CVE or kidney stone respectively). Only outcomes with at least 30 events in the PrePTX period were analysed.
